# Supplementary material for: Estimated Glucose Disposal Rate and Mortality in Cardiovascular Kidney Metabolic Syndrome: Nonlinear Associations and Stratified Prognostic Significance by Glycometabolic Phenotypes
Source: Research Square preprint supplement (doi:10.21203/rs.3.rs-7258966/v1), 2025-08-12
Supplement: Supplementary file 1 [file 69d624eb68146626551dc4e4.docx]

**Supplementary material**

**S1.** Association between eGDR levels with all-cause mortality, cardiovascular specific mortality, and

diabetes specific mortality of diabetic participants

|  | **Death (n)** | **Model 1** |  | **Model 2** |  | **Model 3** |  |
| --- | --- | --- | --- | --- | --- | --- | --- |
|  |  | **HR (95%CI)** | ***P*** | **HR (95%CI)** | ***P*** | **HR (95%CI)** | ***P*** |
| All-cause mortality |  |  |  |  |  |  |  |
| Continuous | 695 | 0.93(0.88-0.97) | <0.001 | 0.93(0.88-0.98) | 0.010 | 0.91(0.85-0.97) | 0.003 |
| Q1 | 170 | Ref |  | Ref |  | Ref |  |
| Q2 | 188 | 0.88(0.67-1.17) | 0.396 | 0.68(0.52-0.89) | 0.005 | 0.72(0.54-0.96) | 0.025 |
| Q3 | 208 | 0.95(0.76-1.19) | 0.667 | 0.75(0.59-0.94) | 0.011 | 0.67(0.49-0.92) | 0.014 |
| Q4 | 129 | 0.54(0.38-0.78) | <0.001 | 0.61(0.43-0.88) | 0.008 | 0.56(0.36-0.87 | 0.009 |
| *p*-trend |  |  | 0.002 |  | 0.013 |  | 0.015 |
| Cardiovascular specific mortality |  |  |  |  |  |  |  |
| Continuous | 234 | 0.90(0.84-0.97) | 0.006 | 0.90(0.83-0.99) | 0.030 | 0.83(0.80-0.99) | 0.030 |
| Q1 | 59 | Ref |  | Ref |  | Ref |  |
| Q2 | 64 | 0.88(0.44-1.46) | 0.471 | 0.61(0.34-1.09) | 0.096 | 0.68(0.38-1.20) | 0.182 |
| Q3 | 74 | 1.02(0.64-1.61) | 0.940 | 0.81(0.52-1.29) | 0.379 | 0.86(0.49-1.51) | 0.591 |
| Q4 | 37 | 0.45(0.25-0.80) | 0.007 | 0.52(0.29-0.92) | 0.025 | 0.56(0.27-1.16) | 0.121 |
| *p*-trend |  |  | 0.019 |  | 0.060 |  | 0.249 |
| Diabetes specific mortality |  |  |  |  |  |  |  |
| Continuous | 199 | 0.91(0.84-0.99) | 0.028 | 0.92(0.83-1.02) | 0.101 | 0.92(0.83-1.01) | 0.076 |
| Q1 | 60 | Ref |  | Ref |  | Ref |  |
| Q2 | 56 | 0.67(0.39-1.14) | 0.141 | 0.61(0.34-1.09) | 0.096 | 0.52(0.32-0.84) | 0.008 |
| Q3 | 45 | 0.47(0.27-0.81) | 0.006 | 0.81(0.52-1.29) | 0.376 | 0.32(0.17-0.58) | <0.001 |
| Q4 | 38 | 0.49(0.29-0.82) | 0.007 | 0.52(0.29-0.92) | 0.025 | 0.48(0.27-0.86) | 0.013 |
| *p*-trend |  |  | 0.003 |  | 0.017 |  | 0.008 |

eGDR: estimated glucose disposal rate; HR: hazard ratios; CI: confidence interval;

**S2.** Association between eGDR levels with all-cause mortality, cardiovascular specific mortality, and

diabetes specific mortality of prediabetes participants

|  | **Death (n)** | **Model 1** |  | **Model 2** |  | **Model 3** |  |
| --- | --- | --- | --- | --- | --- | --- | --- |
|  |  | **HR (95%CI)** | ***P*** | **HR (95%CI)** | ***P*** | **HR (95%CI)** | ***P*** |
| All-cause mortality |  |  |  |  |  |  |  |
| Continuous | 162 | 0.86(0.84-0.88) | <0.001 | 0.96(0.92-0.99) | 0.013 | 0.82(0.76-0.89) | <0.001 |
| Q1 | 369 | Ref |  | Ref |  | Ref |  |
| Q2 | 372 | 1.03(0.82-1.28) | 0.818 | 1.00(0.83-1.21) | 0.995 | 1.03(0.83-1.28) | 0.804 |
| Q3 | 192 | 0.50(0.41-0.63) | <0.001 | 0.81(0.68-1.01) | 0.066 | 0.82(0.64-1.05) | 0.117 |
| Q4 | 129 | 0.37(0.28-0.49) | <0.001 | 0.82(0.64-1.06) | 0.137 | 0.84(0.60-1.17) | 0.300 |
| *p*-trend |  |  | <0.001 |  | 0.045 |  | 0.142 |
| Cardiovascular specific mortality |  |  |  |  |  |  |  |
| Continuous | 337 | 0.78(0.75-0.82) | <0.001 | 0.86(0.80-0.92) | <0.001 | 0.82(0.76-0.89) | <0.001 |
| Q1 | 134 | Ref |  | Ref |  | Ref |  |
| Q2 | 126 | 0.94(0.67-1.32) | 0.719 | 0.93(0.67-1.29) | 0.649 | 0.88(0.61-1.27) | 0.488 |
| Q3 | 57 | 0.34(0.24-0.49) | <0.001 | 0.57(0.39-0.83) | 0.003 | 0.57(0.40-0.81) | 0.002 |
| Q4 | 20 | 0.13(0.07-0.25) | <0.001 | 0.32(0.17-0.59) | <0.001 | 0.28(0.15-0.54) | <0.001 |
| *p*-trend |  |  | <0.001 |  | <0.001 |  | <0.001 |
| Diabetes specific mortality |  |  |  |  |  |  |  |
| Continuous | 46 | 0.79(0.69-0.92) | 0.002 | 0.85(0.70-1.04) | 0.113 | 0.78(0.60-1.01) | 0.059 |
| Q1 | 23 | Ref |  | Ref |  | Ref |  |
| Q2 | 9 | 0.34(0.14-0.83) | 0.019 | 0.93(0.67-1.29) | 0.649 | 0.21(0.09-0.51) | <0.001 |
| Q3 | 7 | 0.32(0.13-0.78) | 0.013 | 0.57(0.39-0.83) | 0.003 | 0.32(0.11-0.93) | 0.037 |
| Q4 | 7 | 0.25(0.09-0.67) | 0.006 | 0.32(0.17-0.59) | <0.001 | 0.25(0.06-1.02) | 0.053 |
| *p*-trend |  |  | 0.005 |  | 0.327 |  | 0.101 |

eGDR: estimated glucose disposal rate; HR: hazard ratios; CI: confidence interval;

**S3.** Association between eGDR levels with all-cause mortality, cardiovascular specific mortality, and

diabetes specific mortality of normal glucose tolerance participants

|  | **Death (n)** | **Model 1** |  | **Model 2** |  | **Model 3** |  |
| --- | --- | --- | --- | --- | --- | --- | --- |
|  |  | **HR (95%CI)** | ***P*** | **HR (95%CI)** | ***P*** | **HR (95%CI)** | ***P*** |
| All-cause mortality |  |  |  |  |  |  |  |
| Continuous | 695 | 0.78(0.75-0.81) | <0.001 | 0.94(0.89-1.00) | 0.044 | 0.91(0.85-0.97) | 0.004 |
| Q1 | 170 | Ref |  | Ref |  | Ref |  |
| Q2 | 188 | 0.43(0.31-0.59) | <0.001 | 0.87(0.64-1.18) | 0.383 | 0.88(0.66-1.18) | 0.396 |
| Q3 | 208 | 0.26(0.19-0.36) | <0.001 | 0.65(0.48-0.88) | 0.006 | 0.59(0.43-0.80) | <0.001 |
| Q4 | 129 | 0.18(0.12-0.25) | <0.001 | 0.74(0.49-1.13) | 0.160 | 0.57(0.38-0.86) | 0.0080 |
| *p*-trend |  |  | <0.001 |  | 0.075 |  | 0.001 |
| Cardiovascular specific mortality |  |  |  |  |  |  |  |
| Continuous | 234 | 0.73(0.69-0.78) | <0.001 | 0.90(0.83-0.98) | 0.012 | 0.89(0.80-1.00) | 0.042 |
| Q1 | 59 | Ref |  | Ref |  | Ref |  |
| Q2 | 64 | 0.33(0.19-0.56) | <0.001 | 0.71(0.42-1.21) | 0.207 | 0.73(0.44-1.21) | 0.220 |
| Q3 | 74 | 0.26(0.13-0.50) | <0.001 | 0.70(0.38-1.32) | 0.274 | 0.69(0.35-1.35) | 0.272 |
| Q4 | 37 | 0.04(0.02-0.10) | <0.001 | 0.23(0.08-0.64) | 0.005 | 0.23(0.09-0.61) | 0.003 |
| *p*-trend |  |  | <0.001 |  | 0.005 |  | 0.003 |
| Diabetes specific mortality |  |  |  |  |  |  |  |
| Continuous | 199 | 0.59(0.45-0.76) | <0.001 | 0.64(0.42-0.96) | 0.030 | 0.55(0.35-0.87) | 0.010 |

eGDR: estimated glucose disposal rate; HR: hazard ratios; CI: confidence interval;

**S4.**Stratified analyses of the associations between eGDR levels and the occurrence of all-cause mortality in diabetic population

| **Variables** | **n (%)** | **HR (95%CI)** | ***P*** | ***P* for interaction** |
| --- | --- | --- | --- | --- |
|
| Education |  |  |  | 0.740 |
| Below high school | 960 (33.80) | 0.94 (0.88 ~ 1.01) | 0.095 |  |
| High School or above | 1880 (66.20) | 0.88 (0.83 ~ 0.94) | <.001 |  |
| Marital |  |  |  | 0.607 |
| No | 1083 (38.13) | 0.92 (0.86 ~ 0.98) | 0.013 |  |
| Yes | 1757 (61.87) | 0.91 (0.85 ~ 0.97) | 0.002 |  |
| BMI |  |  |  | 0.841 |
| <25 | 409 (14.40) | 0.90 (0.81 ~ 0.99) | 0.023 |  |
| ≥25 and <30 | 835 (29.40) | 0.91 (0.84 ~ 0.99) | 0.031 |  |
| ≥30 | 1596 (56.20) | 0.91 (0.84 ~ 0.97) | 0.005 |  |
| Smoking Status |  |  |  | 0.784 |
| Current Smoker | 460 (16.20) | 0.88 (0.80 ~ 0.98) | 0.014 |  |
| Former Smoker | 975 (34.33) | 0.90 (0.84 ~ 0.96) | 0.003 |  |
| Never Smoker | 1405 (49.47) | 0.92 (0.85 ~ 0.99) | 0.024 |  |
| Age |  |  |  | <.001 |
| <=65 | 1699 (59.82) | 0.81 (0.75 ~ 0.86) | <.001 |  |
| >65 | 1141 (40.18) | 0.99 (0.94 ~ 1.05) | 0.782 |  |
| Gender |  |  |  | 0.440 |
| Male | 1499 (52.78) | 0.90 (0.85 ~ 0.96) | <.001 |  |
| Female | 1341 (47.22) | 0.93 (0.87 ~ 1.00) | 0.065 |  |
| eGDR: estimated glucose disposal rate; BMI: body mass index；HR: hazard ratios; CI: confidence interval; | | | | |

**S5.**Stratified analyses of the associations between eGDR levels and the occurrence of cardiovascular specific mortality in diabetic population

| **Variables** | **n (%)** | **HR (95%CI)** | ***P*** | ***P* for interaction** |
| --- | --- | --- | --- | --- |
|
| Education |  |  |  | 0.509 |
| Below high school | 960 (33.80) | 0.87 (0.77 ~ 0.98) | 0.024 |  |
| High School or above | 1880 (66.20) | 0.87 (0.78 ~ 0.96) | 0.008 |  |
| Marital |  |  |  | 0.674 |
| No | 1083 (38.13) | 0.86 (0.77 ~ 0.96) | 0.006 |  |
| Yes | 1757 (61.87) | 0.90 (0.80 ~ 1.01) | 0.076 |  |
| BMI |  |  |  | 0.889 |
| <25 | 409 (14.40) | 0.86 (0.73 ~ 1.02) | 0.091 |  |
| ≥25 and <30 | 835 (29.40) | 0.87 (0.75 ~ 1.00) | 0.046 |  |
| ≥30 | 1596 (56.20) | 0.88 (0.78 ~ 1.00) | 0.055 |  |
| Smoking Status |  |  |  | 0.055 |
| Current Smoker | 460 (16.20) | 0.72 (0.59 ~ 0.89) | 0.002 |  |
| Former Smoker | 975 (34.33) | 1.02 (0.91 ~ 1.15) | 0.749 |  |
| Never Smoker | 1405 (49.47) | 0.78 (0.69 ~ 0.88) | <.001 |  |
| Age |  |  |  | 0.004 |
| <=65 | 1699 (59.82) | 0.75 (0.66 ~ 0.85) | <.001 |  |
| >65 | 1141 (40.18) | 0.96 (0.87 ~ 1.06) | 0.430 |  |
| Gender |  |  |  | 0.996 |
| Male | 1499 (52.78) | 0.89 (0.81 ~ 0.99) | 0.028 |  |
| Female | 1341 (47.22) | 0.86 (0.76 ~ 0.98) | 0.028 |  |
| eGDR: estimated glucose disposal rate; BMI: body mass index；HR: hazard ratios; CI: confidence interval; | | | | |

**S6.**Stratified analyses of the associations between eGDR levels and the occurrence of diabetes specific mortality in diabetic population

| **Variables** | **n (%)** | **HR (95%CI)** | ***P*** | ***P* for interaction** |
| --- | --- | --- | --- | --- |
|
| Education |  |  |  | 0.663 |
| Below high school | 960 (33.80) | 0.90 (0.79 ~ 1.02) | 0.099 |  |
| High School or above | 1880 (66.20) | 0.84 (0.75 ~ 0.94) | 0.003 |  |
| Marital |  |  |  | 0.434 |
| No | 1083 (38.13) | 0.90 (0.80 ~ 1.01) | 0.086 |  |
| Yes | 1757 (61.87) | 0.84 (0.75 ~ 0.95) | 0.004 |  |
| BMI |  |  |  | 0.467 |
| <25 | 409 (14.40) | 0.90 (0.76 ~ 1.07) | 0.248 |  |
| ≥25 and <30 | 835 (29.40) | 0.86 (0.73 ~ 1.01) | 0.072 |  |
| ≥30 | 1596 (56.20) | 0.84 (0.74 ~ 0.95) | 0.007 |  |
| Smoking Status |  |  |  | 0.150 |
| Current Smoker | 460 (16.20) | 0.95 (0.78 ~ 1.15) | 0.601 |  |
| Former Smoker | 975 (34.33) | 0.78 (0.68 ~ 0.90) | <.001 |  |
| Never Smoker | 1405 (49.47) | 0.89 (0.78 ~ 1.00) | 0.058 |  |
| Age |  |  |  | 0.071 |
| <=65 | 1699 (59.82) | 0.77 (0.69 ~ 0.87) | <.001 |  |
| >65 | 1141 (40.18) | 0.98 (0.87 ~ 1.11) | 0.798 |  |
| Gender |  |  |  | 0.780 |
| Male | 1499 (52.78) | 0.87 (0.78 ~ 0.97) | 0.011 |  |
| Female | 1341 (47.22) | 0.87 (0.76 ~ 1.00) | 0.043 |  |
| eGDR: estimated glucose disposal rate; BMI: body mass index；HR: hazard ratios; CI: confidence interval; | | | | |

**S7.**Stratified analyses of the associations between eGDR levels and the occurrence of all-cause mortality in prediabetes population

| **Variables** | **n (%)** | **HR (95%CI)** | ***P*** | ***P* for interaction** |
| --- | --- | --- | --- | --- |
|
| Education |  |  |  | 0.411 |
| Below high school | 1845 (26.54) | 0.98 (0.92 ~ 1.05) | 0.564 |  |
| High School or above | 5106 (73.46) | 0.94 (0.90 ~ 0.98) | 0.009 |  |
| Marital |  |  |  | 0.642 |
| No | 2550 (36.69) | 0.93 (0.87 ~ 0.98) | 0.009 |  |
| Yes | 4401 (63.31) | 0.98 (0.93 ~ 1.02) | 0.326 |  |
| BMI |  |  |  | 0.962 |
| <25 | 1684 (24.23) | 0.97 (0.91 ~ 1.04) | 0.443 |  |
| ≥25 and <30 | 2541 (36.56) | 0.95 (0.90 ~ 1.01) | 0.118 |  |
| ≥30 | 2726 (39.22) | 0.96 (0.90 ~ 1.02) | 0.162 |  |
| Smoking Status |  |  |  | 0.149 |
| Current Smoker | 1430 (20.57) | 1.00 (0.93 ~ 1.08) | 0.930 |  |
| Former Smoker | 1935 (27.84) | 0.93 (0.88 ~ 0.99) | 0.020 |  |
| Never Smoker | 3586 (51.59) | 0.95 (0.89 ~ 1.01) | 0.116 |  |
| Age |  |  |  | 0.537 |
| <=65 | 5080 (73.08) | 0.94 (0.88 ~ 1.00) | 0.051 |  |
| >65 | 1871 (26.92) | 0.96 (0.92 ~ 1.01) | 0.084 |  |
| Gender |  |  |  | 0.689 |
| Male | 3842 (55.27) | 0.97 (0.92 ~ 1.01) | 0.162 |  |
| Female | 3109 (44.73) | 0.94 (0.89 ~ 1.00) | 0.058 |  |
| eGDR: estimated glucose disposal rate; BMI: body mass index；HR: hazard ratios; CI: confidence interval; | | | | |

**S8.**Stratified analyses of the associations between eGDR levels and the occurrence of cardiovascular specific mortality in prediabetes population

| **Variables** | **n (%)** | **HR (95%CI)** | ***P*** | ***P* for interaction** |
| --- | --- | --- | --- | --- |
|
| Education |  |  |  | 0.798 |
| Below high school | 1845 (26.54) | 0.86 (0.75 ~ 0.97) | 0.016 |  |
| High School or above | 5106 (73.46) | 0.87 (0.80 ~ 0.95) | 0.001 |  |
| Marital |  |  |  | 0.527 |
| No | 2550 (36.69) | 0.81 (0.73 ~ 0.91) | <.001 |  |
| Yes | 4401 (63.31) | 0.91 (0.83 ~ 1.00) | 0.052 |  |
| BMI |  |  |  | 0.557 |
| <25 | 1684 (24.23) | 0.80 (0.70 ~ 0.92) | 0.002 |  |
| ≥25 and <30 | 2541 (36.56) | 0.91 (0.81 ~ 1.01) | 0.085 |  |
| ≥30 | 2726 (39.22) | 0.88 (0.79 ~ 0.99) | 0.037 |  |
| Smoking Status |  |  |  | 0.689 |
| Current Smoker | 1430 (20.57) | 0.91 (0.78 ~ 1.07) | 0.256 |  |
| Former Smoker | 1935 (27.84) | 0.85 (0.77 ~ 0.95) | 0.004 |  |
| Never Smoker | 3586 (51.59) | 0.86 (0.77 ~ 0.97) | 0.012 |  |
| Age |  |  |  | 0.282 |
| <=65 | 5080 (73.08) | 0.85 (0.75 ~ 0.97) | 0.015 |  |
| >65 | 1871 (26.92) | 0.87 (0.80 ~ 0.95) | 0.002 |  |
| Gender |  |  |  | 0.478 |
| Male | 3842 (55.27) | 0.90 (0.83 ~ 0.98) | 0.011 |  |
| Female | 3109 (44.73) | 0.80 (0.70 ~ 0.92) | 0.001 |  |

eGDR: estimated glucose disposal rate; BMI: body mass index；HR: hazard ratios; CI: confidence interval;

**S9.**Stratified analyses of the associations between eGDR levels and the occurrence of diabetes specific mortality in prediabetes population

| **Variables** | **n (%)** | **HR (95%CI)** | ***P*** | ***P* for interaction** |
| --- | --- | --- | --- | --- |
|
| Education |  |  |  | 0.387 |
| Below high school | 1845 (26.54) | 0.94 (0.71 ~ 1.24) | 0.640 |  |
| High School or above | 5106 (73.46) | 0.76 (0.60 ~ 0.96) | 0.021 |  |
| Marital |  |  |  | 0.337 |
| No | 2550 (36.69) | 0.73 (0.54 ~ 0.97) | 0.031 |  |
| Yes | 4401 (63.31) | 0.89 (0.71 ~ 1.12) | 0.334 |  |
| BMI |  |  |  | 0.180 |
| <25 | 1684 (24.23) | 1.39 (0.91 ~ 2.14) | 0.129 |  |
| ≥25 and <30 | 2541 (36.56) | 0.75 (0.55 ~ 1.02) | 0.070 |  |
| ≥30 | 2726 (39.22) | 0.70 (0.51 ~ 0.96) | 0.027 |  |
| Smoking Status |  |  |  | 0.437 |
| Current Smoker | 1430 (20.57) | 0.80 (0.49 ~ 1.28) | 0.347 |  |
| Former Smoker | 1935 (27.84) | 0.85 (0.65 ~ 1.11) | 0.239 |  |
| Never Smoker | 3586 (51.59) | 0.86 (0.63 ~ 1.17) | 0.341 |  |
| Age |  |  |  | 0.044 |
| <=65 | 5080 (73.08) | 0.72 (0.55 ~ 0.95) | 0.020 |  |
| >65 | 1871 (26.92) | 0.95 (0.76 ~ 1.20) | 0.672 |  |
| Gender |  |  |  | 0.077 |
| Male | 3842 (55.27) | 0.72 (0.57 ~ 0.91) | 0.007 |  |
| Female | 3109 (44.73) | 1.00 (0.76 ~ 1.31) | 0.988 |  |

eGDR: estimated glucose disposal rate; BMI: body mass index；HR: hazard ratios; CI: confidence interval;

**S10.** The ROC information of eGDR, TyG, and HOMA-IR indicators in predicting mortality in the CKM population

|  | AUC (95%CI) | Accuracy (95%CI) | Sensitivity (95%CI) | Specificity (95%CI) | Cut off |
| --- | --- | --- | --- | --- | --- |
| All-cause mortality |  |  |  |  |  |
| eGDR | 0.672 (0.662-0.683) | 0.405 (0.398-0.412) | 0.427 (0.419-0.435) | 0.271 (0.253-0.288) | 7.844 |
| TyG | 0.609 (0.597-0.620) | 0.435 (0.428-0.442) | 0.379 (0.372-0.387) | 0.781 (0.765-0.797) | 8.368 |
| HOMA-IR | 0.524(0.512-0.537) | 0.499 (0.492-0.507) | 0.491(0.483-0.499) | 0.554 (0.534-0.573) | 2.306 |
| Cardiovascular specific mortality |  |  |  |  |  |
| eGDR | 0.697 (0.681-0.713) | 0.439 (0.432-0.446) | 0.450 (0.442-0.457) | 0.203 (0.175 -0.232) | 7.797 |
| TyG | 0.608 (0.588-0.627) | 0.381 (0.373-0.388) | 0.362 (0.354-0.369) | 0.803 (0.775 -0.831) | 8.363 |
| HOMA-IR | 0.535 (0.514-0.556) | 0.790 (0.784-0.796) | 0.815 (0.809-0.820) | 0.250 (0.219-0.280) | 4.806 |
| Diabetes specific mortality |  |  |  |  |  |
| eGDR | 0.776 (0.750-0.802) | 0.301 (0.295-0.308) | 0.302(0.295-0.308) | 0.277 (0.223-0.331) | 6.082 |
| TyG | 0.740 (0.709-0.771) | 0.703 (0.696-0.710) | 0.704(0.697-0.710) | 0.673 (0.616-0.730) | 8.923 |
| HOMA-IR | 0.679 (0.645-0.713) | 0.739 (0.733-0.746) | 0.742(0.735-0.748) | 0.554 (0.493-0.614) | 3.921 |

eGDR: estimated glucose disposal rate; HOMA-IR: homeostasis model assessment of insulin resistance; TyG: triglyceride glucose; BMI: body mass index；HR: hazard ratios; CI: confidence interval; ROC: receiver operating characteristic;

**S11.** The ROC information of eGDR, TyG, and HOMA-IR indicators in predicting mortality in the diabetic population

|  | AUC (95%CI) | Accuracy (95%CI) | Sensitivity (95%CI) | Specificity (95%CI) | Cut off |
| --- | --- | --- | --- | --- | --- |
| All-cause mortality |  |  |  |  |  |
| eGDR | 0.527 (0.503-0.551) | 0.602 (0.384-0.620) | 0.732 (0.714-0.751) | 0.200 (0.170-0.230) | 6.409 |
| TyG | 0.533 (0.508-0.557) | 0.586 (0.568-0.604) | 0.643 (0.623-0.663) | 0.410 (0.374-0.447) | 9.311 |
| HOMA-IR | 0.545 (0.520-0.570) | 0.371 (0.353-0.389) | 0.280 (0.261-0.299) | 0.650 (0.615-0.686) | 3.093 |
| Cardiovascular specific mortality |  |  |  |  |  |
| eGDR | 0.539 (0.502-0.575) | 0.719 (0.702-0.735) | 0.771 (0.754-0.787) | 0.141 (0.096-0.186) | 6.757 |
| TyG | 0.530(0.491-0.570) | 0.492 (0.473-0.510) | 0.483 (0.464-0.502) | 0.594 (0.531-0.657) | 9.077 |
| HOMA-IR | 0.553 (0.514-0.591) | 0.331 (0.313-0.348) | 0.306 (0.289-0.324) | 0.603 (0.540-0.665) | 3.236 |
| Diabetes specific mortality |  |  |  |  |  |
| eGDR | 0.553 (0.511-0.594) | 0.364 (0.346-0.382) | 0.350 (0.332-0.368) | 0.548 (0.479- 0.617) | 4.033 |
| TyG | 0.570 (0.527-0.613) | 0.724 (0.707-0.741) | 0.750 (0.734-0.767) | 0.382 (0.314-0.449) | 9.542 |
| HOMA-IR | 0.495 (0.454-0.536) | 0.436 (0.417-0.454) | 0.421 (0.402-0.440) | 0.628 (0.561-0.695) | 4.072 |

eGDR: estimated glucose disposal rate; HOMA-IR: homeostasis model assessment of insulin resistance; TyG: triglyceride glucose; BMI: body mass index；HR: hazard ratios; CI: confidence interval; ROC: receiver operating characteristic;

**S12.** The ROC information of eGDR, TyG, and HOMA-IR indicators in predicting mortality in the Prediabetes population

|  | AUC (95%CI) | Accuracy (95%CI) | Sensitivity (95%CI) | Specificity (95%CI) | Cut off |
| --- | --- | --- | --- | --- | --- |
| All-cause mortality |  |  |  |  |  |
| eGDR | 0.616 (0.599-0.633) | 0.467 (0.455-0.479) | 0.499 (0.486-0.512) | 0.291 (0.264-0.318) | 7.726 |
| TyG | 0.568 (0.551-0.586) | 0.511 (0.499-0.522) | 0.491 (0.478-0.504) | 0.620 (0.590-0.649) | 8.634 |
| HOMA-IR | 0.535 (0.516-0.554) | 0.552 (0.540-0.563) | 0.589 (0.576-0.601) | 0.346 (0.317-0.374) | 3.360 |
| Cardiovascular specific mortality |  |  |  |  |  |
| eGDR | 0.655 (0.629-0.681) | 0.515 (0.503-0.527) | 0.531 (0.519-0.543) | 0.190 (0.148-0.232) | 7.894 |
| TyG | 0.571 (0.542-0.600) | 0.507 (0.495-0.519) | 0.501 (0.489-0.513) | 0.626 (0.574-0.678) | 8.666 |
| HOMA-IR | 0.528 (0.496-0.560) | 0.403 (0.392-0.415) | 0.396 (0.384-0.408) | 0.540 (0.487-0.593) | 2.403 |
| Diabetes specific mortality |  |  |  |  |  |
| eGDR | 0.634 (0.550-0.717) | 0.296 (0.285-0.307) | 0.295 (0.284-0.305) | 0.457 (0.313-0.600) | 5.713 |
| TyG | 0.653 (0.575-0.730) | 0.681 (0.670-0.692) | 0.682 (0.671-0.693) | 0.609 (0.468-0.750) | 8.939 |
| HOMA-IR | 0.500 (0.413-0.588) | 0.553 (0.541-0.565) | 0.553 (0.542-0.565) | 0.522 (0.377-0.666) | 3.123 |

eGDR: estimated glucose disposal rate; HOMA-IR: homeostasis model assessment of insulin resistance; TyG: triglyceride glucose; BMI: body mass index；HR: hazard ratios; CI: confidence interval; ROC: Receiver Operating Characteristic;

**S13.** The ROC information of eGDR, TyG, and HOMA-IR indicators in predicting mortality in the normal glucose tolerance population

|  | AUC (95%CI) | Accuracy (95%CI) | Sensitivity (95%CI) | Specificity (95%CI) | Cut off |
| --- | --- | --- | --- | --- | --- |
| All-cause mortality |  |  |  |  |  |
| eGDR | 0.696 (0.677-0.715) | 0.305 (0.295-0.315) | 0.300 (0.290-0.311) | 0.350 (0.316-0.384) | 8.472 |
| TyG | 0.583 (0.563-0.602) | 0.443 (0.432-0.454) | 0.415 (0.404-0.426) | 0.729 (0.697-0.760) | 8.234 |
| HOMA-IR | 0.539 (0.517-0.560) | 0.598 (0.587-0.608) | 0.626 (0.615-0.637) | 0.306 (0.273-0.339) | 2.129 |
| Cardiovascular specific mortality |  |  |  |  |  |
| eGDR | 0.723 (0.690-0.756) | 0.251 (0.241-0.260) | 0.247 (0.238-0.257) | 0.374 (0.308-0.440) | 7.621 |
| TyG | 0.573 (0.537-0.609) | 0.484 (0.474-0.495) | 0.479 (0.469-0.490) | 0.684 (0.621-0.748) | 8.335 |
| HOMA-IR | 0.519 (0.480-0.559) | 0.569 (0.558-0.580) | 0.574 (0.564-0.585) | 0.354 (0.289-0.420) | 1.938 |
| Diabetes specific mortality |  |  |  |  |  |
| eGDR | 0.770 (0.665-0.875) | 0.240 (0.231-0.250) | 0.240 (0.231-0.249) | 0.333 (0.095-0.572) | 7.406 |
| TyG | 0.686 (0.560-0.813) | 0.487 (0.476-0.498) | 0.486 (0.476-0.497) | 0.867 (0.695-1.000) | 8.349 |
| HOMA-IR | 0.572 (0.424-0.719) | 0.551 (0.540-0.562) | 0.551 (0.540-0.562) | 0.600 (0.352-0.848) | 1.864 |

eGDR: estimated glucose disposal rate; HOMA-IR: homeostasis model assessment of insulin resistance; TyG: triglyceride glucose; BMI: body mass index；HR: hazard ratios; CI: confidence interval; ROC: Receiver Operating Characteristic;

**Supplemental Methods—Assessment of CKM Syndrome Stages**[1]

Cardiovascular-kidney-metabolic (CKM) syndrome stages were identified among National Health and Nutrition Examination Survey (NHANES) participants in accordance with the 2023 American Heart Association (AHA) Presidential Advisory on CKM Health. We only included adults ≥20 years in the fasting subsample of NHANES, which is a nationally representative subsample of the US noninstitutionalized population and comprises approximately half of NHANES. Among patients in the fasting subsample, missingness rates for all physical examination and laboratory measurements were low. (<10%). Thus, no correction for missingness was performed. Participants with insufficient data to determine CKM stage were excluded (<5%).

In this analysis, CKM stage definitions were adapted to data available in NHANES. Age, sex, race, and ethnicity were determined by self-report. Diabetes and hypertension definitions were based on biomarkers (e.g., glycated hemoglobin) or healthcare diagnoses, while history of CVD (heart failure, coronary heart disease, and stroke) was determined by self-report. Estimated glomerular filtration (GFR) rate was calculated using the race-free CKD-EPI 2021 creatinine equation.

CKM Stage 0 included participants with normal body mass index (BMI) (<23 kg/m² for individuals with Asian ethnicity and <25 kg/m² for other racial and ethnic groups), normal waist circumference (<80 and <90 cm for women and men with Asian race, respectively, and <88 and <102 cm for women and men in all other race and ethnicity categories, respectively) who did not meet criteria for the other stages.

CKM Stage 1 identified individuals with an elevated BMI (≥23 kg/m² for individuals with Asian race and >25 kg/m² for all other race and ethnic groups), an elevated waist circumference (≥80 and ≥90 cm for women and men with Asian race, respectively, and ≥88 and ≥102 cm for women and men in other race and ethnicity categories, respectively), or prediabetes (defined as a glycated hemoglobin of 5.7% to <6.5% or a fasting blood glucose of 100 mg/dL to <126 mg/dL).

CKM Stage 2 identified participants with metabolic risk factors or moderate-to-high-risk CKD per Kidney Disease Improving Global Outcomes (KDIGO) criteria, as recommended by the AHA.

Qualifying metabolic risk factors included elevated fasting serum triglycerides (≥135 mg/dL), hypertension, diabetes, or metabolic syndrome (≤3 of the following: elevated waist circumference, low high density lipoprotein cholesterol (HDL) level [<40 mg/dL or <50 mg/dL for men or women, respectively], fasting serum triglycerides ≥150 mg/dL, elevated blood pressure [systolic blood pressure ≥130, diastolic blood pressure ≥80 mmHg, and/or use of blood pressure-lowering medications], or prediabetes). CKD stages were identified based on GFR and urinary albumin-to-creatinine ratio.

CKM Stage 3 was identified based on the presence of very-high-risk KDIGO CKD stages or a high-predicted 10-year CVD risk. 10-year cardiovascular risk was estimated with the AHA Predicting Risk of CVD EVENTS (PREVENT) equations. High risk was defined as ≥20% 10-year CVD risk (based on recommended thresholds [<https://professional.heart.org/en/guidelinesand-statements/prevent-calculator>]). The PREVENT equations were developed and validated for adults 30 - 79 years of age. As such, risk was not estimated for adults <30 years. However, to minimize underestimation of CKD Stage 3, adults ≥80 years were not excluded from 10-year CVD risk. Instead, adults ≥80 years were assigned an age of 79 years when determining 10-year CVD risk to allow for conservative estimates. Further, PREVENT was developed for variables with the following ranges: total cholesterol 130 - 320 mg/dL, HDL 20 - 100 mg/dL, systolic blood pressure 90 - 200 mmHg, and GFR 14 - 140 mL/min/1.73 m². To approximate PREVENT risk strata, values for these variables above or below these bounds were set to the upper or lower bounds of allowable values respectively (for example, total cholesterol of 330 mg/dL was set as 320 mg/dL). Cardiac biomarkers and cardiovascular imaging were not available to identify subclinical CVD.

CKM Stage 4 was identified based on self-reported established cardiovascular disease (coronary heart disease, angina, heart attack, heart failure, and stroke). Atrial fibrillation and peripheral artery disease were not included, as these data were not available.

Reference:

1. Ndumele CE, Neeland IJ, Tuttle KR, Chow SL, Mathew RO, Khan SS, et al. A Synopsis of the Evidence for the Science and Clinical Management of Cardiovascular-Kidney-Metabolic (CKM) Syndrome: A Scientific Statement From the American Heart Association. Circulation. 2023;148:1636–64.
